# Supplementary figures and images for: Electrochemical nucleation and growth of Pd/PdCo core–shell nanoparticles with enhanced activity and durability as fuel cell catalyst
Source: Royal Society of Chemistry journal article supplement (doi:10.1039/c3ta15220k), 2014-01-01

Supplementary Information

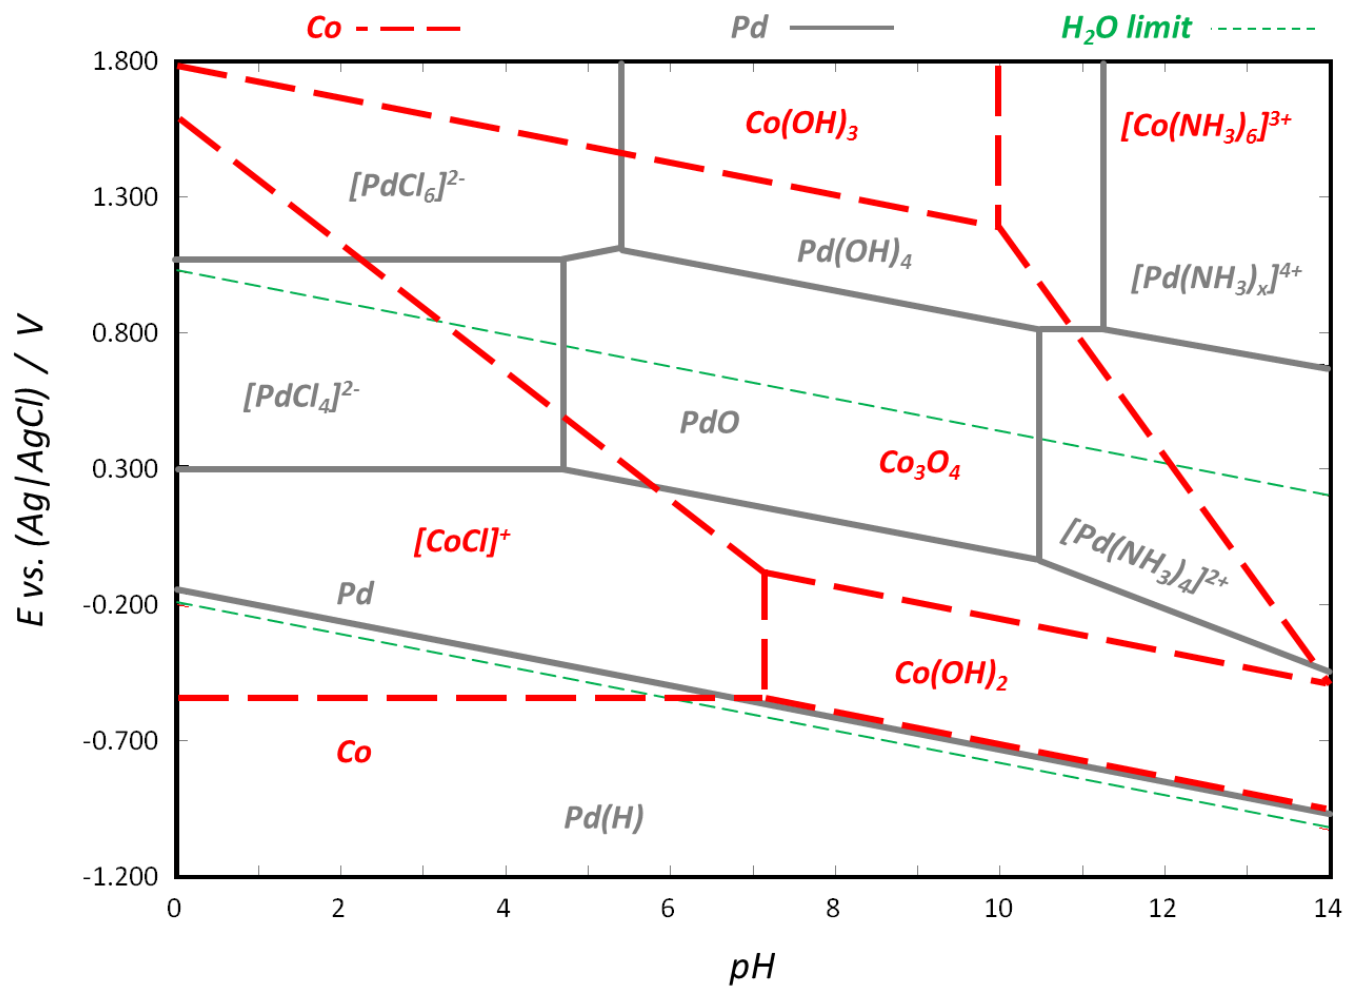

Figure S1.

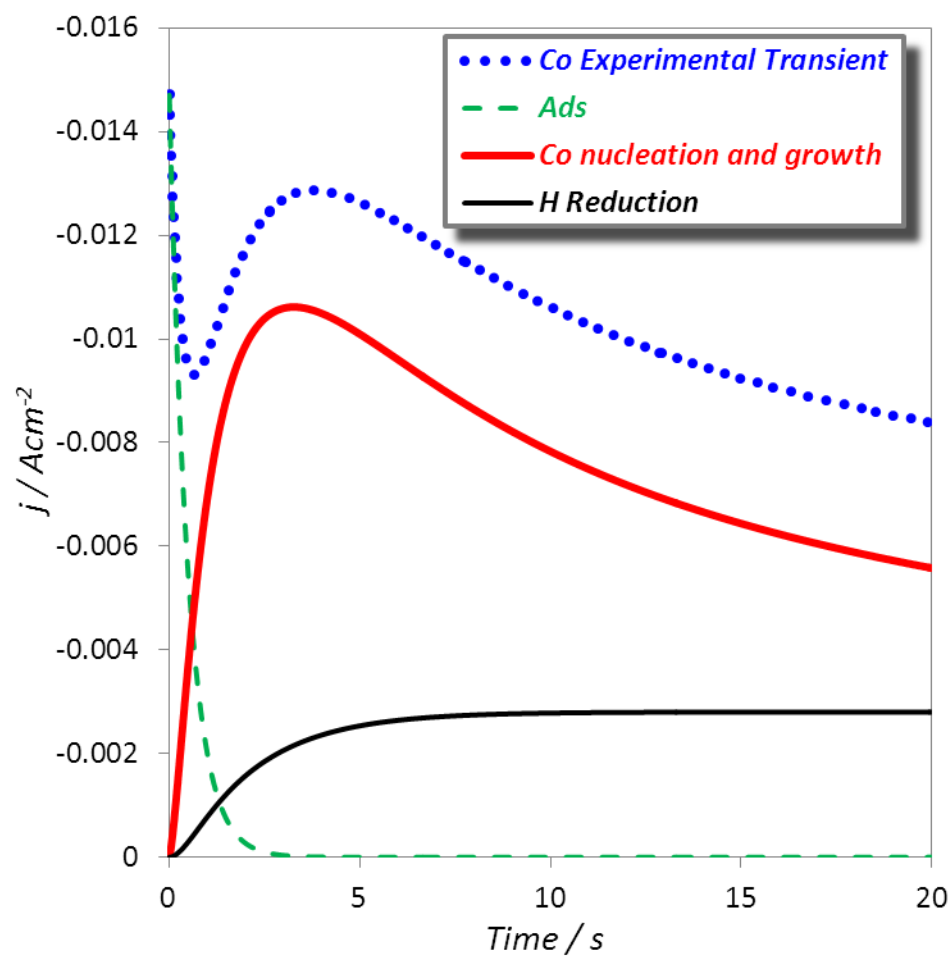

**Figure S2.**

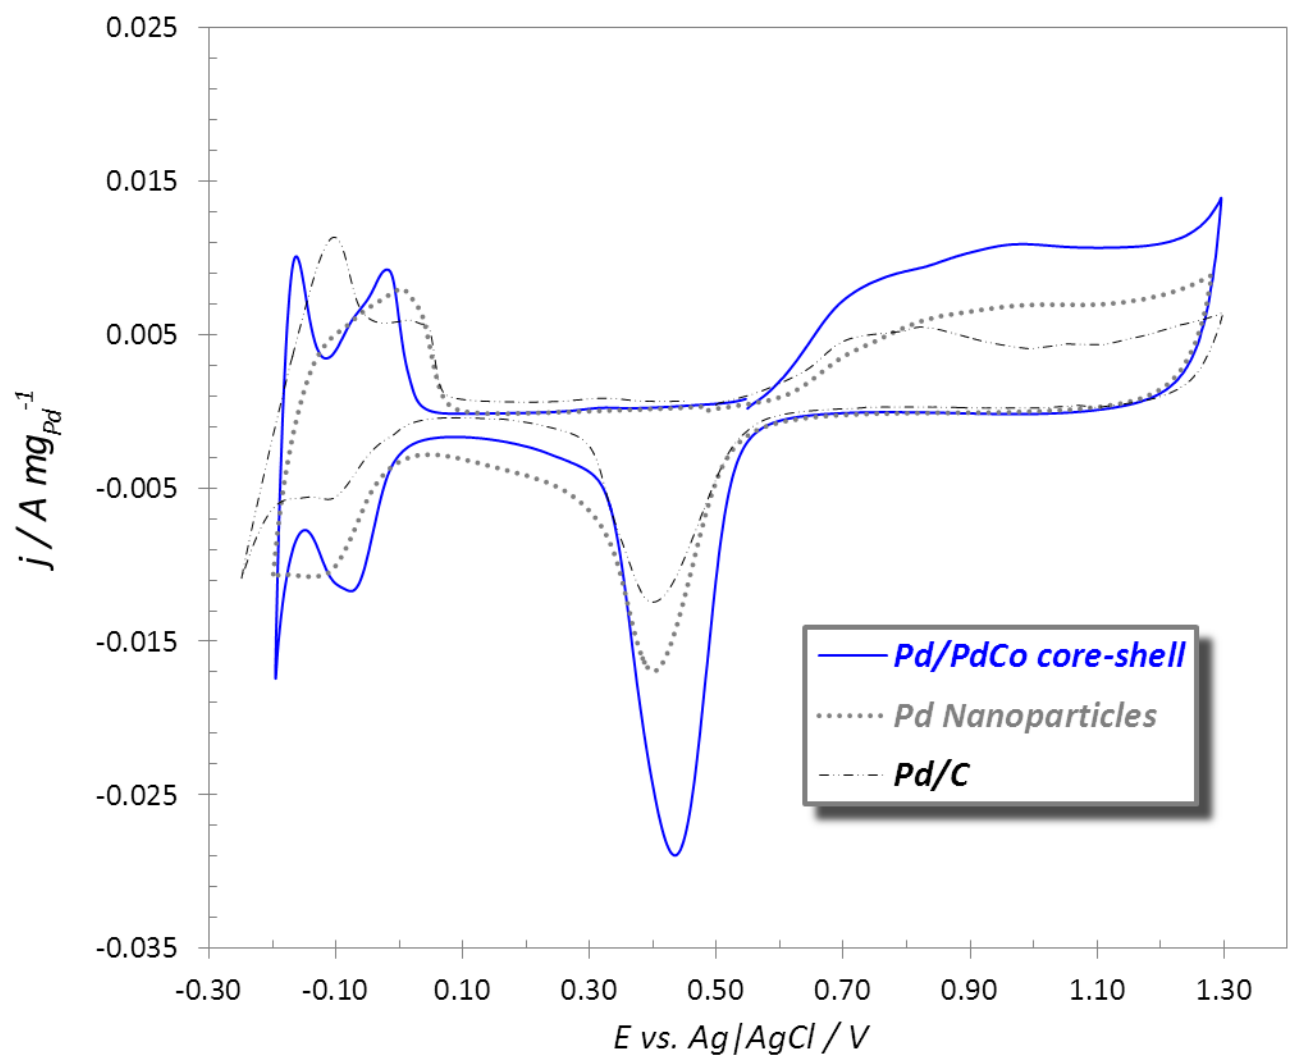

**Figure S3.**

Supplement: c3ta15220k.pdf [file c3ta15220k.pdf]
